# Supplementary material for: Patient listening on social media for patient-focused drug development: a synthesis of considerations from patients, industry and regulators
Source: PubMed Central journal article supplement (PMC10955474; doi:10.3389/fmed.2024.1274688), 2024-03-06
Supplement: Data_Sheet_1.pdf [file Data_Sheet_1.pdf]

## Appendix Q

### Query 1:

((“social media”[Title/Abstract]) AND (patient[Title/Abstract]) AND ((listening[Title/Abstract]) OR monitoring[Title/Abstract])) NOT ((survey[Title/Abstract] OR engage[Title/Abstract] OR engagement[Title/Abstract] OR recruit[Title/Abstract] OR recruitment[Title/Abstract] OR use[Title]))

### Query 2:

| Set# | Searched for                                                                                                                                                                                                                                                                                                                                                                                                                                                                                                                                    | Databases                           |
|------|-------------------------------------------------------------------------------------------------------------------------------------------------------------------------------------------------------------------------------------------------------------------------------------------------------------------------------------------------------------------------------------------------------------------------------------------------------------------------------------------------------------------------------------------------|-------------------------------------|
| S1   | TI,AB(“drug* development*” OR “ R&D” OR “research and development” OR “clinical research” OR “patient focused drug development*” OR “drug discovery” OR “patient-centered drug* development” OR “patient centered drug* development” OR “patient-focused drug development*” OR “pharma* R&D” OR “pharmaceutical development*” OR “early research” OR “drug research” OR “scientific research” OR “utilised for research*” OR “patient-centric drug development” OR “patient centric drug development” OR “clinical stud*” OR “clinical trial*”) | embase1974date, medlineprof1950date |
| S2   | MJMESB.EXACT.EXPLODE(“Drug Industry”) OR MJEMB.EXACT.EXPLODE(“drug industry”) OR “TI,AB(“pharmaceutical companies” OR “pharmaceutical company” OR “pharmaceutical industr*” OR “Pharm* development” OR “Pharma compan*” OR “drug* development” OR “drug* research”)                                                                                                                                                                                                                                                                             | embase1974date, medlineprof1950date |
| S3   | MJEMB.EXACT(“social media analysis”) OR MJEMB.EXACT.EXPLODE(“social media monitoring”) OR MJMESB.EXACT(“Social Media”) OR MJEMB.EXACT(“social media”)                                                                                                                                                                                                                                                                                                                                                                                           | embase1974date, medlineprof1950date |
| S4   | TI,AB(“Social media listening” OR “social media mining” OR “social media monitoring”) OR TI(“social media” OR “social listening”)                                                                                                                                                                                                                                                                                                                                                                                                               | embase1974date, medlineprof1950date |

|    |                                                                                                                                                                                                                                                                                                                                                                                                                                                                                                                                                                                                                                                                                         |                                        |
|----|-----------------------------------------------------------------------------------------------------------------------------------------------------------------------------------------------------------------------------------------------------------------------------------------------------------------------------------------------------------------------------------------------------------------------------------------------------------------------------------------------------------------------------------------------------------------------------------------------------------------------------------------------------------------------------------------|----------------------------------------|
| S5 | S4 OR S3                                                                                                                                                                                                                                                                                                                                                                                                                                                                                                                                                                                                                                                                                | embase1974date,<br>medlineprof1950date |
| S6 | S5 AND S2 AND S1                                                                                                                                                                                                                                                                                                                                                                                                                                                                                                                                                                                                                                                                        | embase1974date,<br>medlineprof1950date |
| S7 | TI,AB( ""drug* development*"" OR "" R&D"" OR ""research and development"" OR ""clinical research"" OR ""patient focused drug development*"" OR ""drug discovery"" OR ""patient-centered drug* development"" OR ""patient centered drug* development"" OR ""patient-focused drug development*"" OR ""pharma* R&D"" OR ""pharmaceutical development*"" OR ""early research"" OR ""drug research"" OR ""scientific research"" OR ""utilised for research*"" OR ""patient-centric drug development"" OR ""patient centric drug development"" OR ""clinical stud*"" OR ""clinical trial*"" OR ""Real world data"" OR ""real world evidence"" OR ""RWE"" OR ""RWD"" OR ""real world stud*"" ) | embase1974date,<br>medlineprof1950date |
| S8 | S7 AND S4                                                                                                                                                                                                                                                                                                                                                                                                                                                                                                                                                                                                                                                                               | embase1974date,<br>medlineprof1950date |
| S9 | (S8 OR S6) and (pd(2013-2023))                                                                                                                                                                                                                                                                                                                                                                                                                                                                                                                                                                                                                                                          | embase1974date,<br>medlineprof1950date |

## Appendix A

| Indications                                                                                                                                                                                                                                                                                                                                                                                                                                                                                                                                                                                                                                                                                                                                     | Goals/Objectives                                                                                                                                                                                                                                                                                                                                                                                                                                                                                                                                                                                                                                                                                                                                                                                     | Sources                                                                                                                                                                                                                                                                                                                                                                                                                                                                                                                                                                                                                                                                                    | Sponsors                                                                                                                                                                                                                                                                                                                                                                                                                                                                                                                                                    |
|-------------------------------------------------------------------------------------------------------------------------------------------------------------------------------------------------------------------------------------------------------------------------------------------------------------------------------------------------------------------------------------------------------------------------------------------------------------------------------------------------------------------------------------------------------------------------------------------------------------------------------------------------------------------------------------------------------------------------------------------------|------------------------------------------------------------------------------------------------------------------------------------------------------------------------------------------------------------------------------------------------------------------------------------------------------------------------------------------------------------------------------------------------------------------------------------------------------------------------------------------------------------------------------------------------------------------------------------------------------------------------------------------------------------------------------------------------------------------------------------------------------------------------------------------------------|--------------------------------------------------------------------------------------------------------------------------------------------------------------------------------------------------------------------------------------------------------------------------------------------------------------------------------------------------------------------------------------------------------------------------------------------------------------------------------------------------------------------------------------------------------------------------------------------------------------------------------------------------------------------------------------------|-------------------------------------------------------------------------------------------------------------------------------------------------------------------------------------------------------------------------------------------------------------------------------------------------------------------------------------------------------------------------------------------------------------------------------------------------------------------------------------------------------------------------------------------------------------|
| <p><b>Acute Myeloid Leukemia</b> [3]</p> <p><b>Amblyopia</b> [59]</p> <p><b>Ankylosing spondylitis</b> [38]</p> <p><b>Atopic dermatitis</b> [53, 65]</p> <p><b>Bronchiectasis</b> [28]</p> <p><b>Cancer</b> [23]</p> <p><b>Chronic Kidney Disease</b> [28]</p> <p><b>Chronic ocular pain</b> [21]</p> <p><b>Complement 3 Glomerulopathy (C3G)</b> [63]</p> <p><b>COVID-19 / Long COVID</b> [25, 26, 39, 43]</p> <p><b>Crohn's Disease</b> [2]</p> <p><b>Dental medicine</b> [1, 14]</p> <p><b>Diseases that require hysterectomy</b> [27]</p> <p><b>Dry Eye Disease</b> [22]</p> <p><b>Eosinophil-Driven Diseases (EGPA &amp; HES)</b> [58]</p> <p><b>GI Discomfort</b> [50]</p> <p><b>Gout</b> [18]</p> <p><b>Hematologic cancers</b> [37]</p> | <p><b>Analyze online communication behavior and influence of key opinion leaders</b> [33, 62, 67]</p> <p><b>Barriers to care</b> [39, 52]</p> <p><b>Common mental health symptoms</b> [27, 51]</p> <p><b>Disease burden, key symptoms</b> [4, 8, 22, 25, 30, 34, 36, 40-46, 49, 50, 53-60]</p> <p><b>Emotional impact of disease, diagnosis and treatment</b> [10, 15, 18, 22, 26, 48, 65]</p> <p><b>HRQoL impacts</b> [7, 17, 21, 23, 42, 49, 54-56, 59-61, 63-65, 67]</p> <p><b>Identify perceived causes for disease</b> [21]</p> <p><b>Identify/Predict condition</b> [25, 32, 44, 50]</p> <p><b>Impact on caregivers</b> [15, 16, 19, 22, 32, 34, 40, 58]</p> <p><b>Patient-reported experiences, symptoms, outcomes and patient journeys</b> [1, 4, 8, 16, 17, 20, 21, 25, 28, 34, 36, 40,</p> | <p><b>Consumer reviews</b> [53]</p> <p><b>Facebook</b> [7, 10, 14, 18, 21, 22, 29, 31, 39, 43, 49, 58, 61]</p> <p><b>Instagram</b> [7, 53]</p> <p><b>News</b> [17, 53, 59, 63, 64, 67]</p> <p><b>Online forums, blogs</b> [5-7, 10-12, 17, 21, 29, 31, 32, 34, 39, 42, 45, 48-50, 53, 56, 58, 59, 63, 64, 66, 67]</p> <p><b>Patient Communities</b> [8, 9, 16, 19, 20, 23, 25, 28, 34, 35, 37, 38, 44-46, 49, 50, 54, 55, 58, 60]</p> <p><b>Reddit</b> [11, 18, 42, 43, 53, 58]</p> <p><b>Tumblr</b> [29, 53, 58]</p> <p><b>Twitter</b> [1, 3, 5, 6, 10, 11, 14, 15, 17, 21, 27, 32-34, 39, 42, 46, 47, 49, 52, 53, 57-59, 62-64, 66, 67]</p> <p><b>Youtube</b> [7, 8, 26, 29, 49, 58]</p> | <p><b>AstraZeneca</b> [28]</p> <p><b>Boehringer Ingelheim</b> [2, 24]</p> <p><b>BMS</b> [23, 35, 36]</p> <p><b>Chiesi</b> [28]</p> <p><b>GSK</b> [37, 58]</p> <p><b>Horizon Therapeutics</b> [18]</p> <p><b>Johnson &amp; Johnson</b> [8, 30]</p> <p><b>Merck</b> [54, 55]</p> <p><b>Neurocrine Biosciences</b> [15, 32]</p> <p><b>Novartis</b> [5, 6, 16, 17, 19, 21, 34, 38, 40, 42, 48, 49, 59, 63, 64, 67]</p> <p><b>Novo Nordisk</b> [49]</p> <p><b>Pfizer</b> [3, 8, 53]</p> <p><b>Pierre Fabre</b> [60]</p> <p><b>Roche</b> [11, 20, 46, 51, 56]</p> |

|                                                                                                                                                                                                                                                                                                                                                                                                                                                                                                                                                                                                                                                                                                                                                                                                                                                                |                                                                                                                                                                                                                                                                                                                     |  |                                                  |
|----------------------------------------------------------------------------------------------------------------------------------------------------------------------------------------------------------------------------------------------------------------------------------------------------------------------------------------------------------------------------------------------------------------------------------------------------------------------------------------------------------------------------------------------------------------------------------------------------------------------------------------------------------------------------------------------------------------------------------------------------------------------------------------------------------------------------------------------------------------|---------------------------------------------------------------------------------------------------------------------------------------------------------------------------------------------------------------------------------------------------------------------------------------------------------------------|--|--------------------------------------------------|
| <p><b>Immunoglobulin A nephropathy (IgAN)</b> [64]</p> <p><b>Inflammatory bowel disease</b> [29]</p> <p><b>Lung cancer</b> [49]</p> <p><b>Melanoma</b> [16, 18, 35, 60]</p> <p><b>Metastatic Breast Cancer</b> [31, 34, 44, 52]</p> <p><b>Multiple Myeloma</b> [8, 23]</p> <p><b>Multiple Sclerosis</b> 12, [29, 30, 48]</p> <p><b>Myelodysplastic syndromes</b> [19]</p> <p><b>Nutrition</b> [33]</p> <p><b>Obesity</b> [24]</p> <p><b>Parkinson’s disease</b> [45, 56, 68]</p> <p><b>Personality disorder</b> [32]</p> <p><b>Presbyopia</b> [17, 67]</p> <p><b>Psoriasis</b> [47]</p> <p><b>Renal cell carcinoma</b> [36]</p> <p><b>Sarcoma</b> [62]</p> <p><b>Schizophrenia</b> [27]</p> <p><b>SLC6A1 disorder</b> [22]</p> <p><b>Sjögren’s disease</b> [42]</p> <p><b>Systemic juvenile idiopathic arthritis</b> [40]</p> <p><b>Lupus</b> [54, 55, 57]</p> | <p>42, 43, 46, 48-50, 54, 55, 57-60, 63, 64]</p> <p><b>Treatment coverage/Treatment experience</b> [7-9, 26, 35-38, 41, 45, 49, 54, 55, 60, 65, 66]</p> <p><b>Treatment seeking / selection</b> [3, 11, 12, 14, 29, 31, 37-39, 46-49, 54, 66]</p> <p><b>Unmet needs</b> [5, 18, 19, 32, 54, 55, 57, 63, 64, 68]</p> |  | <p><b>Sanofi</b> [65]</p> <p><b>UCB</b> [68]</p> |
|----------------------------------------------------------------------------------------------------------------------------------------------------------------------------------------------------------------------------------------------------------------------------------------------------------------------------------------------------------------------------------------------------------------------------------------------------------------------------------------------------------------------------------------------------------------------------------------------------------------------------------------------------------------------------------------------------------------------------------------------------------------------------------------------------------------------------------------------------------------|---------------------------------------------------------------------------------------------------------------------------------------------------------------------------------------------------------------------------------------------------------------------------------------------------------------------|--|--------------------------------------------------|

|                                                                     |  |  |  |
|---------------------------------------------------------------------|--|--|--|
| <b>Tardive Dyskinesia</b> [15, 32]<br><br><b>Undefined</b> [46, 66] |  |  |  |
|---------------------------------------------------------------------|--|--|--|

*Table A 1: Overview of findings from literature review on published social listening articles with PFDD focus since 2015.*

## References

- [1] Adobes-Martin, M., Montoya-Morcillo, M.-L., Zhou-Wu, A., Garcovich, D. (2021). Invisalign treatment from the patient perspective: A Twitter content analyses. *J Clin Exp Dent* 13, e376–e382. <https://doi.org/10.4317/jced.57835>
- [2] Bichteler, A., Collins, B.G., Walter, S., Wendler, K., Kölling, J., Loonus, Y., et al. (2019). PMU128 My Daughter Loves the New Pens!: Quantifying the Patient Experience With Machine Reading and Applied Semantic Computing. *Value in Health* 22, S730. <https://doi.org/10.1016/j.jval.2019.09.1746>
- [3] Booth, A., Bell, T., Halhol, S., Pan, S., Welch, V., Merinopoulou, E., et al. (2019). Using Social Media to Uncover Treatment Experiences and Decisions in Patients With Acute Myeloid Leukemia or Myelodysplastic Syndrome Who Are Ineligible for Intensive Chemotherapy: Patient-Centric Qualitative Data Analysis. *J Med Internet Res* 21, e14285. <https://doi.org/10.2196/14285>
- [4] Chauhan, J., Aasaithambi, S., Márquez-Rodas, I., Formisano, L., Papa, S., Meyer, N., et al. (2022). Understanding the Lived Experiences of Patients With Melanoma: Real-World Evidence Generated Through a European Social Media Listening Analysis. *JMIR Cancer* 8, e35930. <https://doi.org/10.2196/35930>
- [5] Cook, N., Kostikas, K., Gruenberger, J.-B., Shah, B., Pathak, P., Kaur, V.P., et al. (2019a). Patients' perspectives on COPD: findings from a social media listening study. *ERJ Open Res* 5, 00128–02018. <https://doi.org/10.1183/23120541.00128-2018>
- [6] Cook, N., Mullins, A., Gautam, R., Medi, S., Prince, C., Tyagi, N., et al. (2019b). Evaluating Patient Experiences in Dry Eye Disease Through Social Media Listening Research. *Ophthalmol Ther* 8, 407–420. <https://doi.org/10.1007/s40123-019-0188-4>
- [7] Cotté, F.-E., Voillot, P., Bennett, B., Falissard, B., Tzourio, C., Foulquié, P., et al. (2020). Exploring the Health-Related Quality of Life of Patients Treated With Immune Checkpoint Inhibitors: Social Media Study. *J Med Internet Res* 22, e19694. <https://doi.org/10.2196/19694>
- [8] Crawford, R., Gries, K.S., Morrison, R., Valluri, S., Doward, L., Fastenau, J. (2020). The Patient Experience of Relapsed Refractory Multiple Myeloma and Its Treatment: A Social Media Review. *Blood* 136, 16–16. <https://doi.org/10.1182/blood-2020-142489>

- [9] Dave, A., Yi, J., Boothe, A., Brashear, H., Byrne, J., Gad, Y. (2019). Listening to the HysterSisters: A Retrospective Keyword Frequency Analysis of Conversations About Hysterectomy Recovery. *JMIR Perioper Med* 2, e10728. <https://doi.org/10.2196/10728>
- [10] Delestre-Levai, I., Aliberti, S., Almagro, M., Carnini, C., Chalmers, J.D., George, S.C., et al. (2021). Patients' perspectives on bronchiectasis: findings from a social media listening study. *ERJ Open Res* 7, 00096–02021. <https://doi.org/10.1183/23120541.00096-2021>
- [11] Dobson, R., Pasquarelli, N., Gafarova, M., Eighteen, C., Joschko, N., Mandel, C., et al. (2022). The patient perspective on family planning needs and priorities in multiple sclerosis: a combined quantitative and qualitative research study. *Mult Scler* 28, 130–691. <https://doi.org/10.1177/13524585221123687>
- [12] Donkers, S.J., Kirkland, M.C., Charabati, M., Osborne, L.C. (2020). Perspectives of People with Multiple Sclerosis About Helminth Immunotherapy. *Int J MS Care* 22, 43–51. <https://doi.org/10.7224/1537-2073.2019-044>
- [13] Ellouze, M., Hadrich Belguith, L. (2022). A hybrid approach for the detection and monitoring of people having personality disorders on social networks. *Soc Netw Anal Min* 12, 67. <https://doi.org/10.1007/s13278-022-00884-x>
- [14] Emmott, R., Barber, S.K., Thompson, W. (2021). Antibiotics and toothache: a social media review. *Int J Pharm Pract* 29, 210–217. <https://doi.org/10.1093/ijpp/riaa024>
- [15] Farrar, M., Lundt, L., Franey, E., Yonan, C. (2021). Patient perspective of tardive dyskinesia: results from a social media listening study. *BMC Psychiatry* 21, 94. <https://doi.org/10.1186/s12888-021-03074-9>
- [16] Faust, G., Booth, A., Merinopoulou, E., Halhol, S., Tosar, H., Nawaz, A., et al. (2022). The Experiences of Patients With Adjuvant and Metastatic Melanoma Using Disease-Specific Social Media Communities in the Advent of Novel Therapies (Excite Project): Social Media Listening Study. *JMIR Cancer* 8, e34073. <https://doi.org/10.2196/34073>
- [17] Findley, A., Sharma, G., Bentley, S., Arbuckle, R., Patalano, F., Naujoks, C., et al. (2023). Comparison of Literature Review, Social Media Listening, and Qualitative Interview Research Methods in Generating Patient-Reported Symptom and Functional Impact Concepts of Presbyopia. *Ophthalmol Ther* 12, 501–516. <https://doi.org/10.1007/s40123-022-00620-w>

- [18] Flurie, M., Coe, J., Converse, M., Davidson, K., Flowers, C., Gavigan, K., et al. (2022). Real-World Evidence from Social Media Provides Insights into Patient Mental Health Outcomes in the Management of Gout [abstract], in: *Arthritis & Rheumatology* 74 (suppl 9). URL <https://acrabstracts.org/abstract/real-world-evidence-from-social-media-provides-insights-into-patient-mental-health-outcomes-in-the-management-of-gout/> (accessed 1.6.23).
- [19] Frank, P.P., Lu, M.X.E., Sasse, E.C. (2023). Educational and Emotional Needs of Patients with Myelodysplastic Syndromes: An AI Analysis of Multi-Country Social Media. *Adv Ther* 40, 159–173. <https://doi.org/10.1007/s12325-022-02277-0>
- [20] Freeman, T.C.B., Rodriguez-Esteban, R., Gottowik, J., Yang, X., Erpenbeck, V.J., Leddin, M. (2021). A Neural Network Approach for Understanding Patient Experiences of Chronic Obstructive Pulmonary Disease (COPD): Retrospective, Cross-sectional Study of Social Media Content. *JMIR Med Inform* 9, e26272. <https://doi.org/10.2196/26272>
- [21] Goel, K., Parashar, N., Aasaithambi, S., Verma, H., O'Brien, P., Sloesen, B. (2022). P33 Patient Experiences and Insights on Chronic Ocular Pain from a Social Media Listening Study. *Value in Health* 25, S8. <https://doi.org/10.1016/j.jval.2021.11.032>
- [22] Goodspeed, K., Mosca, L.R., Weitzel, N.C., Horning, K., Simon, E.W., Pfalzer, A.C., et al. (2023). A draft conceptual model of SLC6A1 neurodevelopmental disorder. *Front. Neurosci.* 16, 1026065. <https://doi.org/10.3389/fnins.2022.1026065>
- [23] Gries, K.S., Fastenau, J. (2020). Using a digital patient powered research network to identify outcomes of importance to patients with multiple myeloma. *J Patient Rep Outcomes* 4, 74. <https://doi.org/10.1186/s41687-020-00242-5>
- [24] Hartung, M., Schwering, N., Loonus, Y., Cimiano, P., Jaeger, A.A., Collins, B. (2021). Automatically analyzing online patient experience data with Natural Language Processing: an instrument to investigate health status and help-seeking factors in patients with obesity. *Quality of Life Research* 28.
- [25] Hasan, A., Levene, M., Weston, D., Fromson, R., Koslover, N., Levene, T. (2022). Monitoring COVID-19 on Social Media: Development of an End-to-End Natural Language Processing Pipeline Using a Novel Triage and Diagnosis Approach. *J Med Internet Res* 24, e30397. <https://doi.org/10.2196/30397>



- [26] He, Q., Du, F., Simonse, L.W.L. (2021). A Patient Journey Map to Improve the Home Isolation Experience of Persons With Mild COVID-19: Design Research for Service Touchpoints of Artificial Intelligence in eHealth. *JMIR Med Inform* 9, e23238. <https://doi.org/10.2196/23238>
- [27] Hswen, Y., Naslund, J.A., Brownstein, J.S., Hawkins, J.B. (2018). Monitoring Online Discussions About Suicide Among Twitter Users With Schizophrenia: Exploratory Study. *JMIR Ment Health* 5, e11483. <https://doi.org/10.2196/11483>
- [28] James, G., Nyman, E., Fitz-Randolph, M., Niklasson, A., Hedman, K., Hedberg, J., et al. (2020). Characteristics, Symptom Severity, and Experiences of Patients Reporting Chronic Kidney Disease in the PatientsLikeMe Online Health Community: Retrospective and Qualitative Study. *J Med Internet Res* 22, e18548. <https://doi.org/10.2196/18548>
- [29] Keller, M.S., Mosadeghi, S., Cohen, E.R., Kwan, J., Spiegel, B.M.R. (2018). Reproductive Health and Medication Concerns for Patients With Inflammatory Bowel Disease: Thematic and Quantitative Analysis Using Social Listening. *J Med Internet Res* 20, e206. <https://doi.org/10.2196/jmir.9870>
- [30] Lan, G., Bhat, S.P., Jaideep, S., Gupta, T., Kalyanaraman, S., Ghanapathy, S.V., et al. (2021). Understanding symptoms and their impact on patients with multiple sclerosis: What we can learn from social media. *Mult Scler* 27, 134–740. <https://doi.org/10.1177/13524585211044667>
- [31] Lognos, B., Carbonnel, F., Boulze Launay, I., Bringay, S., Guerdoux-Ninot, E., Mollevi, C., et al. (2019). Complementary and Alternative Medicine in Patients With Breast Cancer: Exploratory Study of Social Network Forum Data. *JMIR Cancer* 5, e12536. <https://doi.org/10.2196/12536>
- [32] Lundt, L., Farrar, M., Franey, E., Yonan, C. (2020). Patient perspective of tardive dyskinesia: results from a social media listening study [abstract], in: *Movement Disorders* 35 (suppl 1). URL <https://onlinelibrary.wiley.com/doi/10.1002/mds.28268> (accessed 1.6.23).
- [33] Lynn, T., Rosati, P., Leoni Santos, G., Endo, P.T. (2020). Sorting the Healthy Diet Signal from the Social Media Expert Noise: Preliminary Evidence from the Healthy Diet Discourse on Twitter. *IJERPH* 17, 8557. <https://doi.org/10.3390/ijerph17228557>

- [34] Mazza, M., Piperis, M., Aasaithambi, S., Chauhan, J., Sagkriotis, A., Vieira, C. (2022). Social Media Listening to Understand the Lived Experience of Individuals in Europe With Metastatic Breast Cancer: A Systematic Search and Content Analysis Study. *Front. Oncol.* 12, 863641. <https://doi.org/10.3389/fonc.2022.863641>
- [35] McDonald, L., Behl, V., Sundar, V., Mehmud, F., Malcolm, B., Ramagopalan, S. (2019a). Validity of social media for assessing treatment patterns in oncology patients: a case study in melanoma. *JAMIA Open* 2, 416–422. <https://doi.org/10.1093/jamiaopen/ooz013>
- [36] McDonald, L., Merinopoulou, E., Cox, A., Malcolm, B., Mehmud, F., Ramagopalan, S. (2018). PCN373 - Understanding Patient Perspectives of Renal Cell Carcinoma Using Social Media: A Qualitative Analysis. *Value in Health* 21, S78. <https://doi.org/10.1016/j.jval.2018.09.455>
- [37] Merinopoulou, E., Cooper, O., Hareendran, A., Booth, A., Faulkner, E.C., Spinner, D.S., et al. (2018). PCN362 – Understanding Patient and Clinician Perceptions of Cell and Gene Therapy in Oncology Using Qualitative Analyses of Social Media Data. *Value in Health* 21, S75–S76. <https://doi.org/10.1016/j.jval.2018.09.444>
- [38] Minhas, D., Noah, B., Dzibur, E., Almario, C., Ishimori, M., Arnold, C., et al. (2017). Patient Knowledge, Attitudes, and Beliefs Regarding Biologic Therapies in Ankylosing Spondylitis (AS): Insights from a Large-Scale Analysis of Social Media Platforms [abstract], in: *Arthritis & Rheumatology* 69 (suppl 10). URL <https://acrabstracts.org/abstract/patient-knowledge-attitudes-and-beliefs-regarding-biologic-therapies-in-ankylosing-spondylitis-as-insights-from-a-large-scale-analysis-of-social-media-platforms/> (accessed 1.6.23).
- [39] Miyake, E., Martin, S. (2021). Long Covid: Online patient narratives, public health communication and vaccine hesitancy. *Digital Health* 7, 205520762110596. <https://doi.org/10.1177/20552076211059649>
- [40] Modica, R.F., Lomax, K.G., Batzel, P., Cassanas, A., Elder, M. (2016). THU0233 Impact of Systemic Juvenile Idiopathic Arthritis/still's Disease on Adolescents as Evidenced through Social Media Posting. *Ann Rheum Dis* 75, 272.2-272. <https://doi.org/10.1136/annrheumdis-2016-eular.3240>

- [41] Patalano, F., Gutzwiller, F.S., Shah, B., Kumari, C., Cook, N.S. (2020). Gathering Structured Patient Insight to Drive the PRO Strategy in COPD: Patient-Centric Drug Development from Theory to Practice. *Adv Ther* 37, 17–26. <https://doi.org/10.1007/s12325-019-01134-x>
- [42] Perella, C., Steenackers, M., Robbins, B., Stone, L., Gervais, R., Schmidt, T., et al. (2023). Patient Experience of Sjögren’s Disease and its Multifaceted Impact on Patients’ Lives. *Rheumatol Ther* 10, 601–614. <https://doi.org/10.1007/s40744-023-00531-7>
- [43] Picone, M., Inoue, S., DeFelice, C., Naujokas, M.F., Sinrod, J., Cruz, V.A., et al. (2020). Social Listening as a Rapid Approach to Collecting and Analyzing COVID-19 Symptoms and Disease Natural Histories Reported by Large Numbers of Individuals. *Population Health Management* 23, 350–360. <https://doi.org/10.1089/pop.2020.0189>
- [44] Ping, Q., Yang, C.C., Marshall, S.A., Avis, N.E., Ip, E.H. (2016). Breast Cancer Symptom Clusters Derived From Social Media and Research Study Data Using Improved SK\$ - Medoid Clustering. *IEEE Trans. Comput. Soc. Syst.* 3, 63–74. <https://doi.org/10.1109/TCSS.2016.2615850>
- [45] Qian, Y., Zhang, Y., He, X., Xu, S., Yang, X., Mo, C., et al. (2021). Findings in Chinese Patients With Parkinson’s Disease: A Content Analysis From the SML Study. *Front. Psychiatry* 12, 615743. <https://doi.org/10.3389/fpsy.2021.615743>
- [46] Quartey, G., Ley-Acosta, S., Pierce, C., Nguyen, A., Ertle, G. (2018). Social Media Listening for Patient Risk Characterization. *Value in Health* 21, S115. <https://doi.org/10.1016/j.jval.2018.04.782>
- [47] Reuter, K., Lee, D. (2021). Perspectives Toward Seeking Treatment Among Patients With Psoriasis: Protocol for a Twitter Content Analysis. *JMIR Res Protoc* 10, e13731. <https://doi.org/10.2196/13731>
- [48] Rezaallah, B., Lewis, D.J., Pierce, C., Zeilhofer, H.-F., Berg, B.-I. (2019). Social Media Surveillance of Multiple Sclerosis Medications Used During Pregnancy and Breastfeeding: Content Analysis. *J Med Internet Res* 21, e13003. <https://doi.org/10.2196/13003>
- [49] Rodrigues, A., Chauhan, J., Sagkriotis, A., Aasaithambi, S., Montrone, M. (2022). Understanding the lived experience of lung cancer: a European social media listening study. *BMC Cancer* 22, 475. <https://doi.org/10.1186/s12885-022-09505-4>

- [50] Schäfer, F., Faviez, C., Voillot, P., Foulquié, P., Najm, M., Jeanne, J.-F., et al. (2020). Mapping and Modeling of Discussions Related to Gastrointestinal Discomfort in French-Speaking Online Forums: Results of a 15-Year Retrospective Infodemiology Study. *J Med Internet Res* 22, e17247. <https://doi.org/10.2196/17247>
- [51] Schmidt, A.L., Rodriguez-Esteban, R., Gottowik, J., Leddin, M. (2022). Applications of quantitative social media listening to patient-centric drug development. *Drug Discovery Today* 27, 1523–1530. <https://doi.org/10.1016/j.drudis.2022.01.015>
- [52] Shimkhada, R., Attai, D., Scheitler, A.J., Babey, S., Glenn, B., Ponce, N. (2021). Using a Twitter Chat to Rapidly Identify Barriers and Policy Solutions for Metastatic Breast Cancer Care: Qualitative Study. *JMIR Public Health Surveill* 7, e23178. <https://doi.org/10.2196/23178>
- [53] Silverberg, J.I., Feldman, S.R., Smith Begolka, W., Johnson, M.B., Stanojev, C., DiBonaventura, M., et al. (2022). Patient perspectives of atopic dermatitis: comparative analysis of terminology in social media and scientific literature, identified by a systematic literature review. *Acad Dermatol Venereol* 36, 1980–1990. <https://doi.org/10.1111/jdv.18442>
- [54] Spies, E., Andreu, T., Koelling, J., Hartung, M., Kamudoni, P., Park, J. (2022a). PCR251 Retrospective Social Listening Study of Patients Living with Systemic Lupus Erythematosus (SLE): Understanding the Patient Experience. *Value in Health* 25(12), S438. <https://doi.org/10.1016/j.jval.2022.09.2184>
- [55] Spies, E., Andreu, T., Koelling, J., Hartung, M., Kamudoni, P., Park, J. (2022b). PCR18 An Exploratory Retrospective Social Listening Study to Identify Patient Experiences Associated With Cutaneous Lupus Erythematosus (CLE). *Value in Health* 25(12), S393. <http://dx.doi.org/10.1016/10.1016/j.jval.2022.09.1953>
- [56] Staunton, H., Kelly, K., Newton, L., Leddin, M., Rodriguez-Esteban, R., Chaudhuri, K.R., et al. (2022). A Patient-Centered Conceptual Model of Symptoms and Their Impact in Early Parkinson's Disease: A Qualitative Study. *JPD* 12, 137–151. <https://doi.org/10.3233/JPD-202457>
- [57] Stens, O., Weisman, M.H., Simard, J., Reuter, K. (2020). Insights From Twitter Conversations on Lupus and Reproductive Health: Protocol for a Content Analysis. *JMIR Res Protoc* 9, e15623. <https://doi.org/10.2196/15623>

- [58] Strobel, M.J., Alves, D., Roufousse, F., Antoun, Z., Kwon, N., Baylis, L., et al. (2022). Insights from Social Media on the Patient Experience of Living With Rare Eosinophil-Driven Diseases. *Journal of Patient Experience* 9, 237437352211439. <https://doi.org/10.1177/23743735221143953>
- [59] Syntosi, A., Felizzi, F., Bouchet, C. (2022). A Social Media Listening Study to Understand the Unmet Needs and Quality of Life in Adult and Pediatric Amblyopia Patients. *Ophthalmol Ther* 11, 2183–2196. <https://doi.org/10.1007/s40123-022-00571-2>
- [60] Tadmouri, A., Alivon, M., Andreu, T., Hartung, M., Ryll, B., Rauch, G., et al. (2022). RWD141 Exploration of Melanoma Patient-Generated Real-World Data Using an Ai-Based Social Listening Approach. *Value in Health* 25, S476–S477. <https://doi.org/10.1016/j.jval.2022.09.2366>
- [61] Tapi Nzali, M.D., Bringay, S., Lavergne, C., Mollevi, C., Opitz, T. (2017). What Patients Can Tell Us: Topic Analysis for Social Media on Breast Cancer. *JMIR Med Inform* 5, e23. <https://doi.org/10.2196/medinform.7779>
- [62] Taylor, J., Pagliari, C. (2018). #Deathbedlive: the end-of-life trajectory, reflected in a cancer patient’s tweets. *BMC Palliat Care* 17, 17. <https://doi.org/10.1186/s12904-018-0273-9>
- [63] Tyagi, N., Aasaithambi, S., Chauhan, J., George, A., Zaour, N. (2019a). PUK32 Patient Insights for Immunoglobulin A Nephropathy (IGAN) Using Social Media Listening. *Value in Health* 22, S919. <https://doi.org/10.1016/j.jval.2019.09.2716>
- [64] Tyagi, N., Aasaithambi, S., Chauhan, J., George, A., Zaour, N. (2019b). PUK33 Patient Insights for Complement 3 Glomerulopathy (C3G) Using Social Media Listening. *Value in Health* 22, S919. <https://doi.org/10.1016/j.jval.2019.09.2717>
- [65] Voillot, P., Riche, B., Portafax, M., Foulquié, P., Gedik, A., Barbarot, S., et al. (2022). Social Media Platforms Listening Study on Atopic Dermatitis: Quantitative and Qualitative Findings. *J Med Internet Res* 24, e31140. <https://doi.org/10.2196/31140>
- [66] Weissenbacher, D., Ge, S., Klein, A., O’Connor, K., Gross, R., Hennessy, S., et al. (2021). Active neural networks to detect mentions of changes to medication treatment in social media. *Journal of the American Medical Informatics Association* 28, 2551–2561. <https://doi.org/10.1093/jamia/ocab158>

- [67] Wolffsohn, J.S., Leteneux-Pantais, C., Chiva-Razavi, S., Bentley, S., Johnson, C., Findley, A., et al. (2020). Social Media Listening to Understand the Lived Experience of Presbyopia: Systematic Search and Content Analysis Study. *J Med Internet Res* 22, e18306. <https://doi.org/10.2196/18306>
- [68] Zhang, H., Meng, F., Li, X., Ning, Y., Cai, M. (2021). Social listening – revealing Parkinson’s disease over day and night. *BMC Neurol* 21, 2. <https://doi.org/10.1186/s12883-020-02024-4>
